# Supplementary material for: Expression of varied GFPs in Saccharomyces cerevisiae: codon optimization yields stronger than expected expression and fluorescence intensity
Source: PubMed Central journal article supplement (PMC5080575; doi:10.1038/srep35932), 2016-10-26
Supplement: srep35932-s1.pdf [file srep35932-s1.pdf]

# **Expression of varied GFPs in *Saccharomyces cerevisiae*: codon optimization yields stronger than expected expression and fluorescence intensity**

**Misato Kaishima<sup>1</sup>, Jun Ishii<sup>2</sup>, Toshihide Matsuno<sup>2</sup>, Nobuo Fukuda<sup>3</sup> and  
Akihiko Kondo<sup>1</sup>**

<sup>1</sup>Department of Chemical Science and Engineering, Graduate School of Engineering, Kobe University, 1-1 Rokkodai, Nada, Kobe 657-8501, Japan

<sup>2</sup>Graduate School of Science, Technology and Innovation, Kobe University, 1-1 Rokkodai, Nada, Kobe 657-8501, Japan

<sup>3</sup>Biomedical Research Institute, National Institute of Advanced Industrial Science and Technology (AIST), Higashi, Tsukuba, Japan

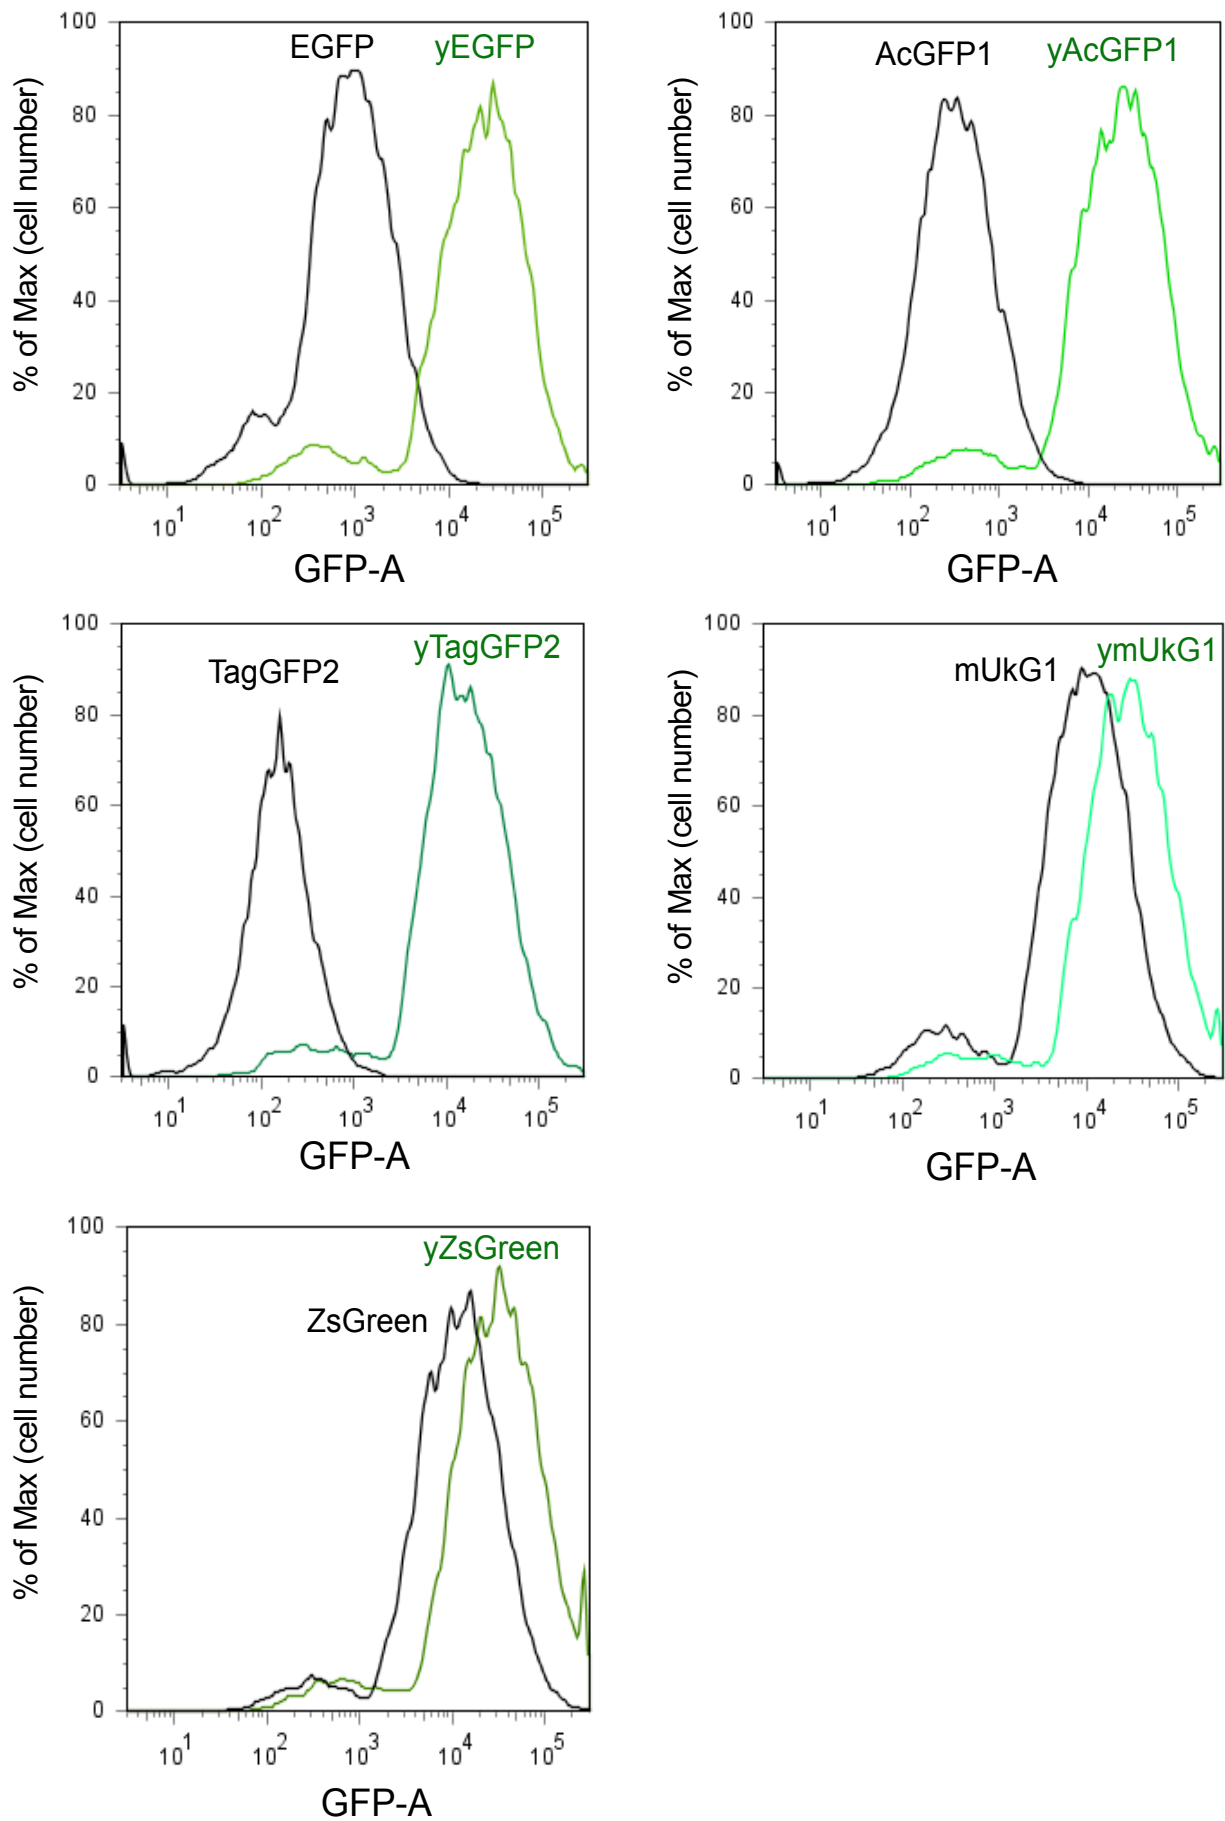

**Figure S1. Histogram plots illustrating codon-optimized and non-codon-optimized GFPs expression in *S. cerevisiae*.** The histogram plots show analytical data measured for 10,000 cells using flow cytometry.

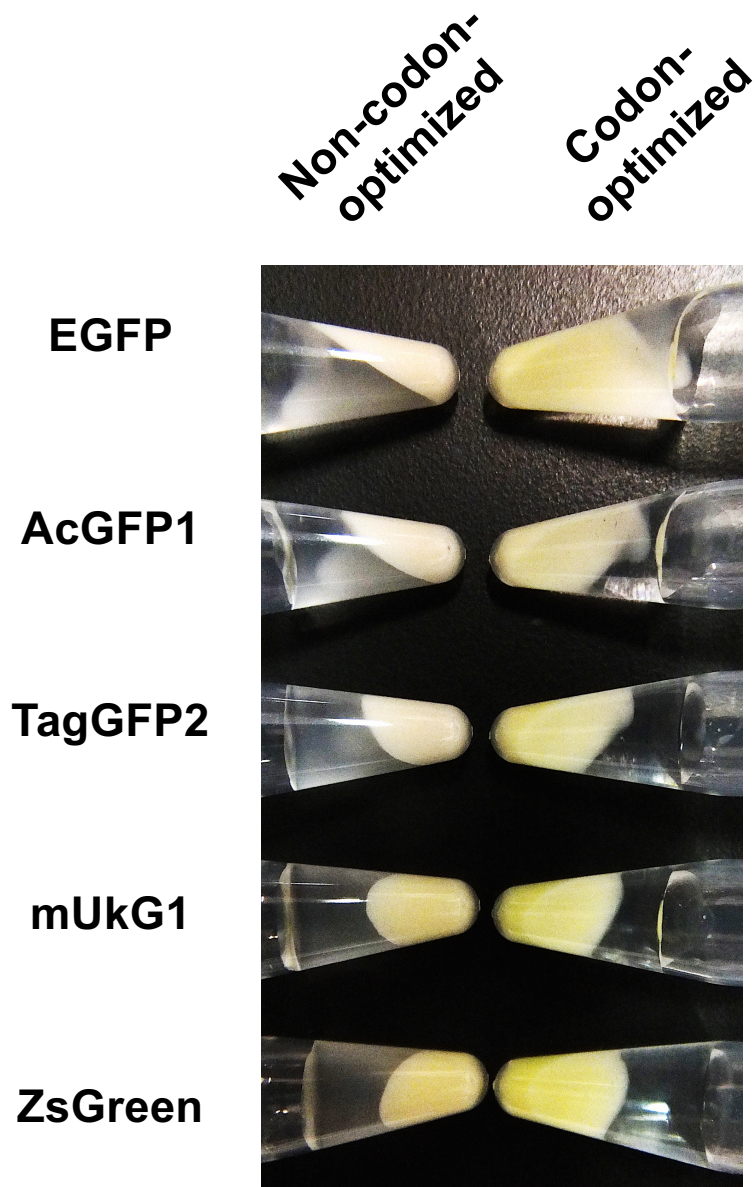

**Figure S2. Visual images of the cells under natural light. Varied codon-optimized and non-codon-optimized GFPs were used in the evaluations.**

(A) G $\gamma$  recruitment system for soluble cytosolic target protein

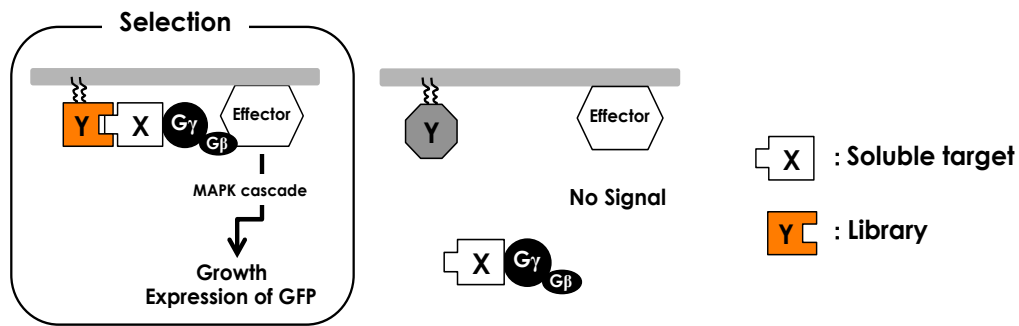

(B) G $\gamma$  recruitment system for membrane target protein

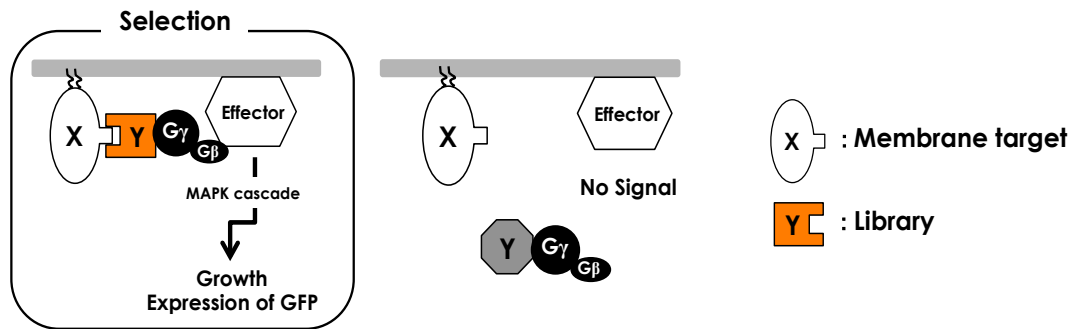

(C)

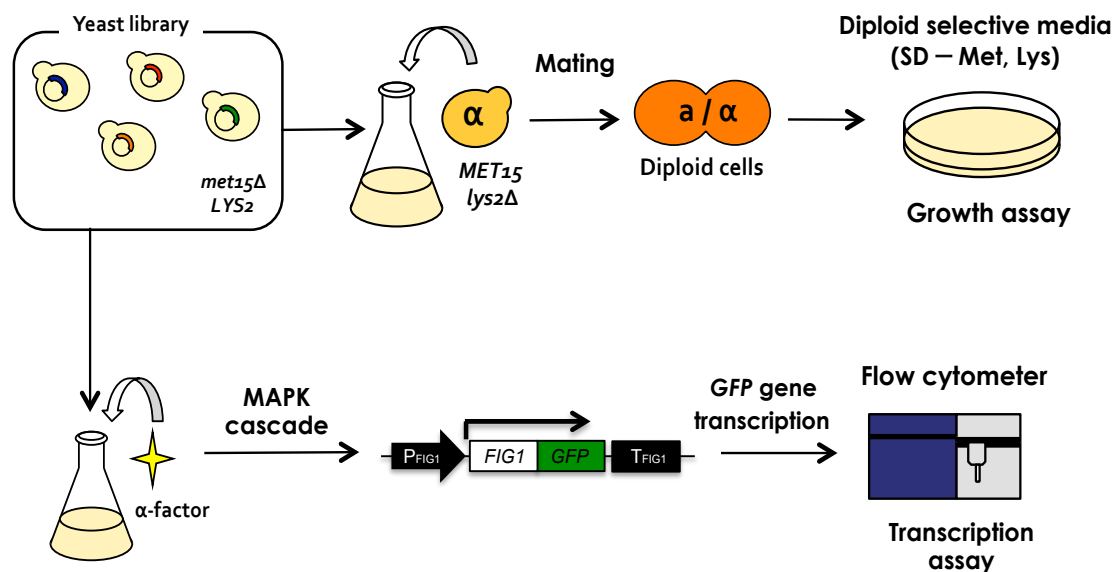

**Figure S3. Schematic diagram of G $\gamma$  recruitment systems used to detect PPIs of cytosolic or membrane target proteins.** (A) Schematic outline of the G $\gamma$  recruitment system for cytosolic target proteins. When target protein 'X', which is fused to G $\gamma$ <sub>cyto</sub>, interacts with candidate protein 'Y<sub>1</sub>', the G $\beta$  and G $\gamma$ <sub>cyto</sub> complex (G $\beta$  $\gamma$ <sub>cyto</sub>) migrates to the inner leaflet of the plasma membrane and restores the signaling function. If protein 'X' cannot interact with protein 'Y', G $\beta$  $\gamma$ <sub>cyto</sub> is released into the cytosol, and signaling is blocked. (B) Schematic outline of the G $\gamma$  recruitment system for membrane protein targets. When membrane target protein 'X' interacts with candidate protein 'Y', which is fused to G $\gamma$ <sub>cyto</sub>, the G $\beta$  $\gamma$ <sub>cyto</sub> complex migrates to the inner leaflet of the plasma membrane and restores the signaling function. If membrane protein 'X' cannot interact with protein 'Y', G $\beta$  $\gamma$ <sub>cyto</sub> is released into the cytosol, and signaling is blocked. (C) Flow diagram of the screening procedure used in the G $\gamma$  recruitment system. Two selection methods are available to screen for new binding proteins. One method uses *GFP* reporter genes. When target candidate proteins are expressed in yeast cells and interact with each other, the proteins induce *GFP* expression, which is detected by flow cytometry.

**G $\gamma$  recruitment system for membrane target protein**

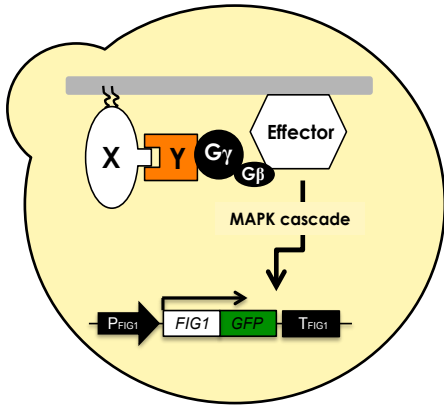

**EGFP**

**ymUkG1**

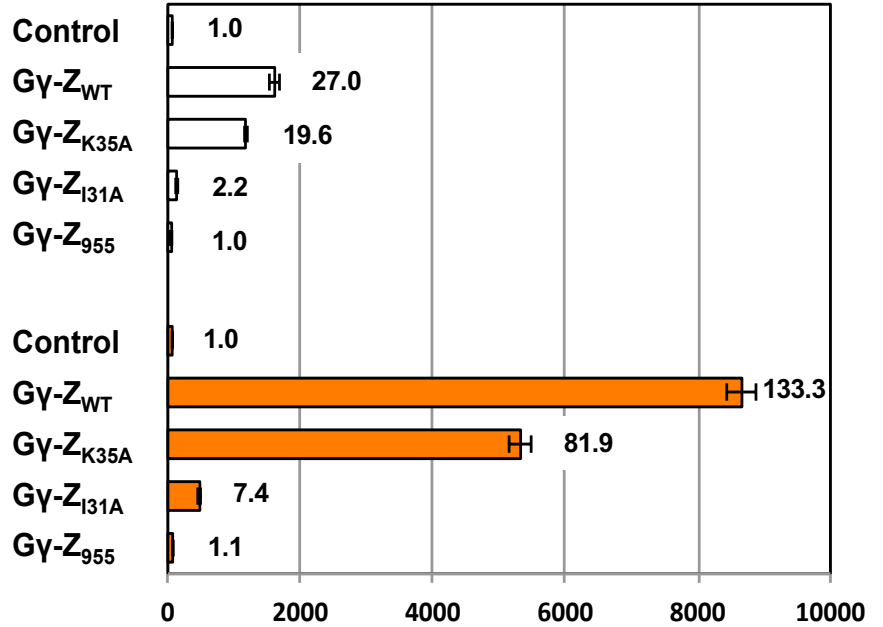

**Figure S4. Expression of non-codon-optimized EGFP and codon-optimized ymUkG1 as fusion-tagged proteins to detect PPIs using the G $\gamma$  recruitment system.**

Flow cytometry analyses using the G $\gamma$  recruitment system for membrane protein targets. The Fc protein was used as the membrane target protein 'X' and was expressed as a membrane-associated protein with an N-terminal lipid anchor (derived from Gpa1p). Four Z variants (Z<sub>WT</sub>, Z<sub>K35A</sub>, Z<sub>I31A</sub> and Z<sub>955</sub>) were used as the cytosolic candidate 'Y' proteins and were expressed as fusion proteins with G $\gamma$ <sub>cyto</sub> (G $\gamma$ <sub>cyto</sub>-Z variants). 'Control' indicates FN-G0 and UG2-FNG0 yeast strains without the expression of 'G $\gamma$ <sub>cyto</sub>-Y'. The engineered strains were grown in media containing 5  $\mu$ M  $\alpha$ -factor and were used in the analyses of mean fluorescence intensities (MFIs). The MFIs of 10,000 cells were measured by flow cytometry.

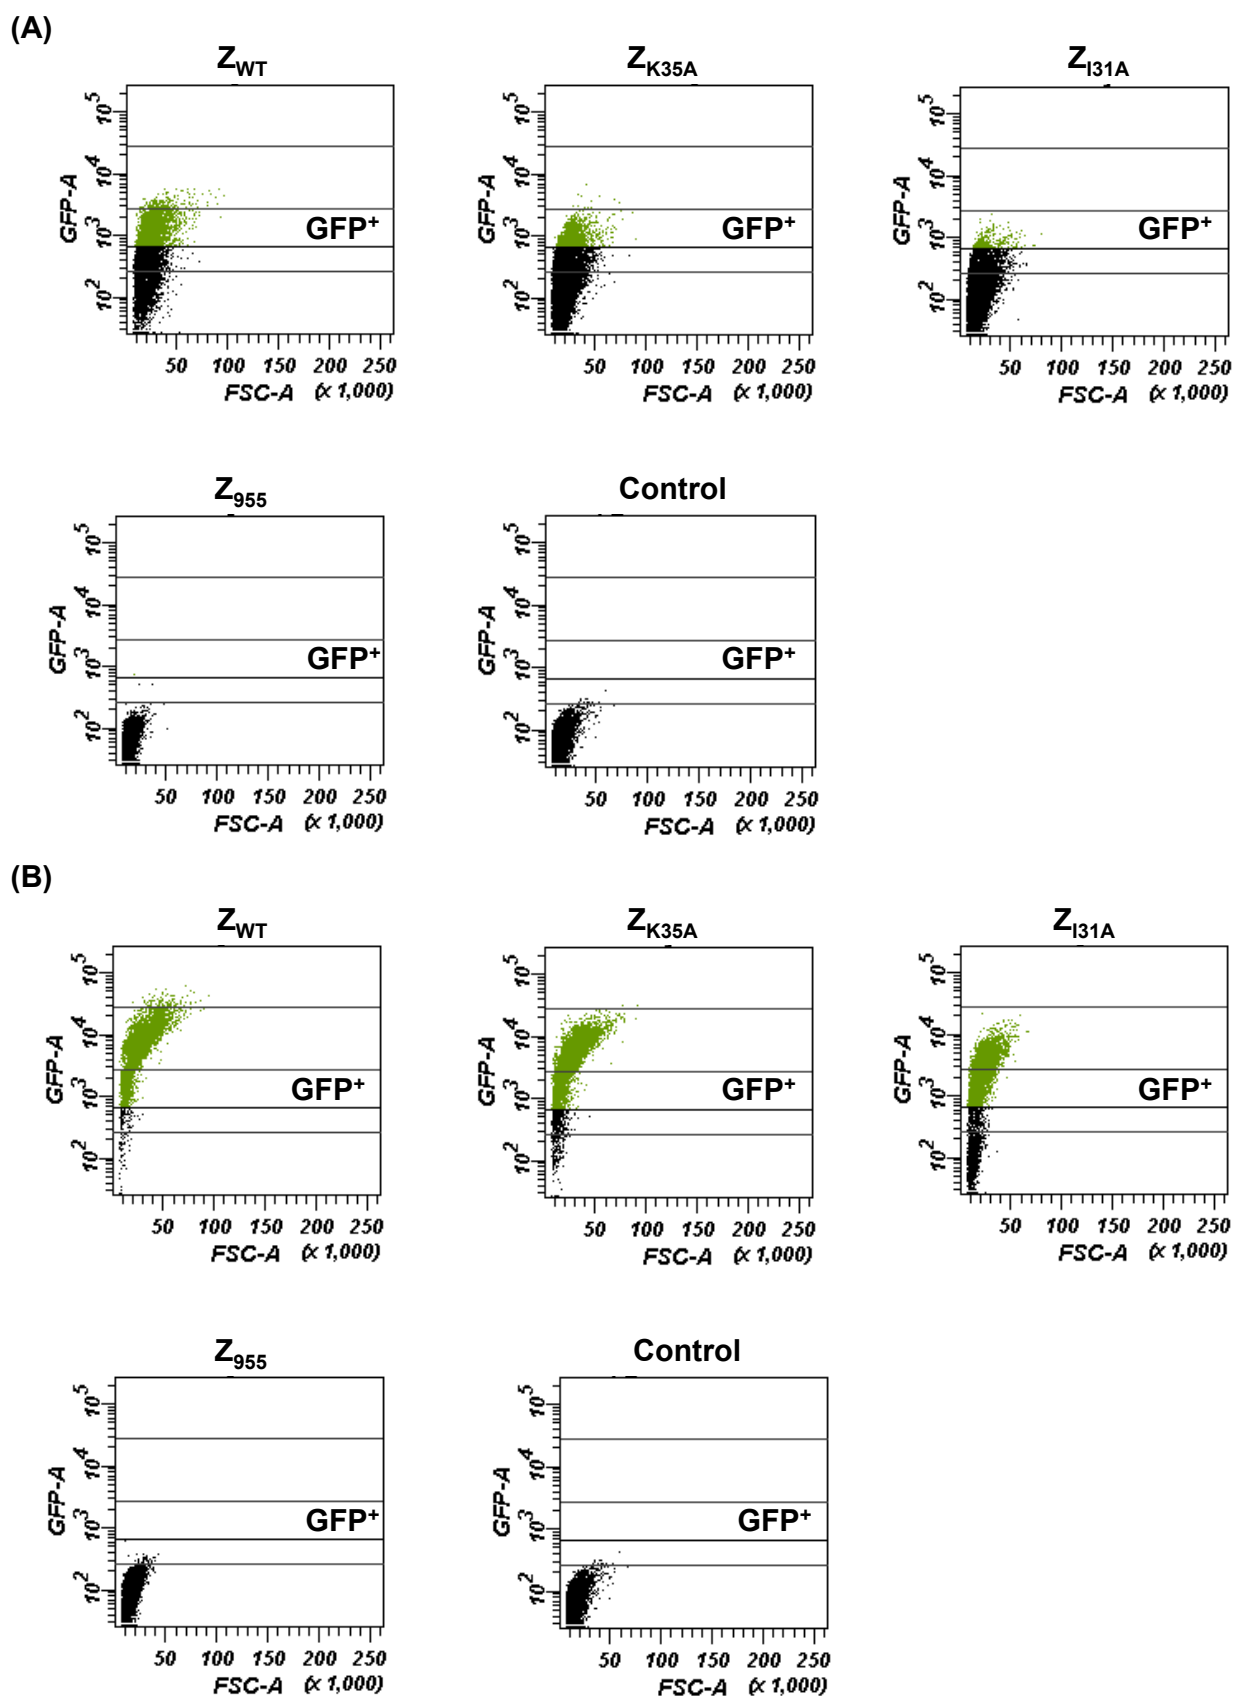

**Figure S5. Determination of gate area to dominantly including positive fluorescent cells (GFP<sup>+</sup>).** Data were presented as dot plots (forward scatter, FSC-A vs green fluorescence, GFP). Y-axis is an indication of fluorescence and X-axis is an approximation of relative cell size. Positive cells express membrane-anchored Z<sub>WT</sub>, Z<sub>K35A</sub> and Z<sub>I31A</sub> with G<sub>Ycyto</sub>-Fc. Negative cells express membrane-anchored Z<sub>955</sub> with G<sub>Ycyto</sub>-Fc. 'Control' indicates BFG2118 and UGFG2 yeast strains harboring the pGK413 mock plasmid (without the expression of 'Y'). (A) Flow cytometry analysis of the BFG2118 yeast transformants (EGFP reporter). (B) Flow cytometry analysis of the UGFG2 yeast transformants (ymUkG1 reporter).

**Supplementary Table S1. Nucleic acid sequences of codon-optimized GFPs for the *Saccharomyces cerevisiae***

**yEGFP**

ATGGTCAGTAAGGGTGAAGAATTATTCAGTGGTGTGTTCCAATCTTGGTTGAATTGGATGGTGTGTTAACGGTCAC  
AAGTTTTCTGTTTCTGGTGAAGGTGAAGGTGATGCTACTTATGGTAAATTGACCTTGAAGTTCATCTGTACCACAGGT  
AAATTGCCAGTTCCATGGCCAACCTTTGGTTACTACTTTGACTTATGGTGTCCAATGCTTCTCTAGATACCCAGATCATA  
TGAAGCAACACGACTTTTTCAAATCCGCTATGCCAGAAGGTTACGTTCAGAAAGAACCATCTTCTCAAGGATGAC  
GGTAACTACAAAACCTAGAGCCGAAGTAAAGTTCGAAGGTGATACCTTGGTTAACAGAATCGAATTGAAGGGTATCGAC  
TTCAAAGAAGATGGTAACATCTTGGGTCATAAGTTGGAATACAACCTACAACCTCCACAACGTTTACATTATGGCCGATA  
AGCAAAAAGAACGGTATCAAGGTTAACTTCAAGATCAGACACAACATCGAAGATGGTAGTGTTCATTGGCTGATCACT  
ACCAACAAAACACTCCAATTGGTGTGATGGTCCAGTTTTGTTGCCAGATAACCATTACTTGTCTACCCAATCTGCTTTGT  
CTAAGGACCCAAACGAAAAAAGAGATCACATGGTCTTGTGGAATTCGTTACTGCTGCTGGTATTACTTTGGGTATGG  
ACGAATTATACAAGTAA

**yAcGFP1**

ATGGTTTCTAAGGGTGTGAATTATTCAGTGGTATCGTTCGAATCTTGAATTGAACGGTGTGTTAACGGTCACA  
AGTTTTCTGTTTCTGGTGAAGGTGAAGGTGATGCTACTTATGGTAAATTGACCTTGAAGTTCATCTGTACCACAGGTA  
AATTGCCAGTTCCATGGCCAACCTTTGGTTACTACTTTGTCTTATGGTGTCCAATGCTTCTCTAGATACCCAGATCATAT  
GAAGCAACACGACTTTTTCAAATCCGCTATGCCAGAAGGTTACATCCAAGAAAGAACCATCTTTTTCGAAGATGACG  
GTAACTACAAGTCTAGAGCTGAAGTAAAGTTCGAAGGTGATACCTTGGTTAACAGAATTGAATTGACCGGTACTGACT  
TCAAAGAAGATGGTAACATTTTGGGTAACAAGATGGAATACAACCTACAACGCCATAACGTTTACATCATGACTGATAA  
GGCTAAGAACGGTATCAAGGTTAACTTCAAGATCAGACACAACATCGAAGATGGTTCAGTTCATTGGCTGATCACTA  
CCAACAAAACACTCCAATTGGTGTGATGGTCCAGTTTTGTTGCCAGATAACCATTACTTGTCTACCCAATCTGCTTTGTCT  
AAGGACCCAAACGAAAAAAGAGATCACATGATCTACTTCGGTTTCGTTACTGCTGCTGCTATTACTCATGGTATGGAC  
GAATTATACAAGTAA

**yTagGFP2**

ATGTCTGGTGGTGAAGAATTATTCAGTGGTATAGTTCCAGTCTTGAATTGGATGGTGTGTTTCATGGTCACAAG  
TTTTCTGTTAGAGGTGAAGGTGAAGGTGATGCTGATTATGGTAAATTGGAAATCAAGTTCATCTGCACCACAGGTAAA  
TTGCCAGTTCCATGGCCAACCTTTGGTTACTACTTTGTGTTACGGTATTCAATGCTTCGCTAGATACCCAGAACATATGA  
AGATGAACGACTTCTTCAAATCCGCTATGCCAGAAGGTTACATTCAAGAAAGAACCATTCAATTCCAAGACGACGGTA  
AATACAAAACAGAGGTGAAGTAAAGTTCGAAGGTGATACTTTGGTCAACAGAATCGAATTGAAGGGTAAAGGACTTC

AAAGAAGATGGTAACATCTTGGGTCATAAGTTGGAATACTCATTCAACTCCCACAACGTTTACATCAGACCAGATAAG  
GCTAACAATGGTTTGAAGCTAACTTCAAGACCAGACATAATATTGAAGGTGGTGGTGGTCAATTGGCCGATCATTAT  
CAAATAATGTTCCATTGGGTGACGGTCCAGTTTTGATTCCAATCAATCATTACTTGTCCACCCAACTAAGATCTCCA  
AGGATAGAAATGAAGCCAGAGATCACATGGTCTTGTGGAATCTTTTTCTGCTTGTGTGCATACCCACGGTATGGACG  
AATTATACAGATGA

### **ymUkG1**

ATGGTCAGTGTCAAAAGAAGAAATGAAGATCAAGTTGCACATGGAAGGTAACGTTAATGGTCATGCCTTTGTTATT  
GAAGGTGATGGTAAAGGTAAACCATACGATGGTACTCAAACCTTGAACCTGACTGTCAAAGAAGGTGCTCCATTGCC  
ATTCTCTACGATATTTGACTAACGCCTTCCAATACGGTAATAGAGCTTTACTAAGTACCCAGCCGATATCCCAGATT  
ACTTTAAGCAAACCTTTCCAGAAGGTTACTCCTGGGAAAGAAGTATGTCTTACGAAGATAACGCTATCTGCAACGTCA  
GATCCGAAATTTCTATGGAAGGTGATTGCTTCATCTACAAGATCAGATTCGATGGTAAGAAGCTTTCCACCAAATGGTC  
CAGTCATGCAAAAAAGACTTTGAAGTGGGAACCATCCACCGAAATGATGTATGTTAGAGATGGTTTCTTGATGGGT  
GATGTCAATATGGCTTTGTTGTTGGAAGGTGGTGGTCATCATAGATGTGATTTCAAGACTTCTTACAAGGCCAAGAAG  
GTTGTTCAATTGCCAGATGCTCATAAGATCGATCACAGAATCGAAATCTTGTCCCACGATAGAGATTACTCCAAGGTTA  
AGTTGTACGAAAACGCTGTTGCTAGAAACTCTTTGTTGCCATCTCAAGCTTCTAAGTAA

### **yZsGreen**

ATGGCTCAATCCAAACATGGTTTGACCAAAGAAATGACCATGAAGTACAGAATGGAAGGTTGTGTTGATGGTCACAA  
GTTTCGTTACTGGTGAAGGTATTGGTTACCCATTCAAAGGTAAGCAAGCTATCAACTTGTGTGTTGTTGAAGGTGG  
TCCATTGCCATTTGCTGAAGATATTTGTCTGCTGCTTTCATGTACGGTAACAGAGTTTTTACTGAATACCCACAAGAT  
ATCGCCGACTACTTTAAGAATTCATGTCCAGCTGGTTACACCTGGGATAGATCTTTTTTGTGTTGAAGATGGTGCTGTC  
TGATCTGCAACGCTGATATTACTGTTTCCGTTGAAGAAAAGTGCATGTACCACGAATCTAAGTTCTACGGTGTTAATT  
TTCCAGCTGATGGTCCAGTTATGAAGAAGATGACTGATAATTGGGAACCATCCTGCGAAAAGATTATTCCAGTTCCAA  
AGCAAGGTATCTTGAAGGGTATGTTTCTATGACTTGTATTGAAGGACGGTGGTAGATTGAGATGTCAATTCGATA  
CTGTTTACAAGGCCAAGTCTGTTCCAAGAAAATGCCTGATTGGCATTTCATCCAACATAAGTTGACCAGAGAAGATA  
GATCCGATGCCAAAATCAAAGTGGCATTGACCGAACATGCTATTGCTTCAGGTTCTGCTTTGCCATAA

### **ymWasabi**

ATGGTCAGTAAAGGTGAAGAACTACTATGGGTGTTATCAAGCCAGACATGAAGATCAAGTTGAAGATGGAAGGTAA  
CGTTAACGGTCATGCCTTTGTTATTGAAGGTGAAGGTGAAGGTAAACCATACGATGGTACTAATACCATTAACCTTGA  
AGTCAAAGAAGGTGCTCCATTGCCATTCTCTTACGATATTTGACTACCGCTTCTCATAACGGTAATAGAGCTTTTACT  
AAGTACCCAGATGACATCCCAAACCTACTTCAAGCAATCTTTCCAGAAGGTTACTCTTGGGAAAGAAGTATGACTTTC



GAAGATAAGGGTATCGTCAAGGTTAAGTCCGATATCTCTATGGAAGAAGATTCCTTCATCTACGAAATCCACTTGAAG  
GGTGAAAATTTCCCACCAAATGGTCCAGTCATGCAAAAAGAAACAACCTGGTTGGGATGCTTCTACCGAAAAGAATGTA  
TGTTAGAGATGGTGTCTTAAAAGGTGACGTCAAAATGAAGTTGTTGTTGGAAGGTGGTGGTCATCATAGAGTTGATT  
TCAAGACTATCTACAGAGCTAAGAAGGCTGTTAAGTTGCCAGATTACCATTTGTTGATCACAGAATCGAAATCTTGA  
ACCACGATAAGGATTACAACAAGGTTACCGTTTACGAAATTGCTGTTGCTAGAAACTCTACCGATGGTATGGATGAATT  
ATACAAGTAA

### **ymNeonGreen**

ATGGTCAGTAAGGGTGAAGAAGATAACATGGCTTCTTTGCCAGCTACTCATGAATTGCATATTTTCGGTTCCATCAAC  
GGTGTGATTTGATATGGTTGGTCAAGGTTACTGGTAATCCAAATGATGGTTACGAAGAATTGAACTTGAAGTCTACTA  
AGGGTGACTTGCAATTCTCTCCATGGATTTTGGTTCCACATATTGGTTACGGTTTCCACCAATATTTGCCATATCCAGA  
TGGTATGTCTCCATTTCAAGCTGCTATGGTTGATGGTTCTGGTTACCAAGTTCATAGAACCATGCAATTTGAAGATGGT  
GCTTCTTTGACCGTCAACTACAGATATACTTACGAAGGTTCCCATATCAAAGGTGAAGCTCAAGTTAAGGGTACTGGT  
TTTCCAGCTGATGGTCCAGTTATGACTAATTCTTTGACTGCTGCTGATTGGTGCAGATCTAAAAGACTTACCCAAAC  
GATAAGACCATCATCTCTACTTTCAAGTGGTCTTACTACTGGTAACGGTAAGAGATATAGATCTACTGCTAGAACTA  
CTTACACCTTCGCTAAACCTATGGCTGCTAACTACTTGAAGAATCAACCTATGTACGTTTTTCAGAAAGACCGAATTGAA  
GCACTCCAAAACCTGAATTGAATTTCAAAGAATGGCAAAAAGGCCTTCACCGATGTTATGGGTATGGATGAATTATACAA  
GTAA

**Supplementary Table S2. List of yeast transformants used for expression of various GFPs**

| Transformant                  | Expression of protein                    | Figure              |
|-------------------------------|------------------------------------------|---------------------|
| BY4741 (Control)              | –                                        | Fig. 1              |
| BY4741 + pGK416-EGFP          | EGFP (mammalian codon-optimized)         | Figs. 1 and S2      |
| BY4741 + pGK416-AcGFP1        | AcGFP1 (mammalian codon-optimized)       | Figs. 1 and S2      |
| BY4741 + pGK416-TagGFP2       | TagGFP2 (mammalian codon-optimized)      | Figs. 1 and S2      |
| BY4741 + pGK416-mUkG1         | mUkG1                                    | Figs. 1 and S2      |
| BY4741 + pGK416-ZsGreen       | ZsGreen                                  | Figs. 1 and S2      |
| BY4741 + pGK416-yEGFP         | yEGFP (yeast codon-optimized)            | Figs. 1 , S1 and S2 |
| BY4741 + pGK416-yAcGFP1       | yAcGFP1 (yeast codon-optimized)          | Figs. 1 , S1 and S2 |
| BY4741 + pGK416-yTagGFP2      | yTagGFP2 (yeast codon-optimized)         | Figs. 1 , S1 and S2 |
| BY4741 + pGK416-ymUkG1        | ymUkG1 (yeast codon-optimized)           | Figs. 1 , S1 and S2 |
| BY4741 + pGK416-yZsGreen      | yZsGreen (yeast codon-optimized)         | Figs. 1 , S1 and S2 |
| BY4741 + pGK416-ymWasabi      | ymWasabi (yeast codon-optimized)         | Fig. S1             |
| BY4741 + pGK416-ymNeonGreen   | ymNeonGreen (yeast codon-optimized)      | Fig. S1             |
| BY4741 + pGK416-EGFP-F        | EGFP (mammalian codon-optimized)-FLAG    | Fig. 1              |
| BY4741 + pGK416-AcGFP1-F      | AcGFP1 (mammalian codon-optimized)-FLAG  | Fig. 1              |
| BY4741 + pGK416-TagGFP2-F     | TagGFP2 (mammalian codon-optimized)-FLAG | Fig. 1              |
| BY4741 + pGK416-mUkG1-F       | mUkG1-FLAG                               | Fig. 1              |
| BY4741 + pGK416-ZsGreen-F     | ZsGreen-FLAG                             | Fig. 1              |
| BY4741 + pGK416-yEGFP-F       | yEGFP (yeast codon-optimized)-FLAG       | Fig. 1              |
| BY4741 + pGK416-yAcGFP1-F     | yAcGFP1 (yeast codon-optimized)-FLAG     | Fig. 1              |
| BY4741 + pGK416-yTagGFP2-F    | yTagGFP2 (yeast codon-optimized)-FLAG    | Fig. 1              |
| BY4741 + pGK416-ymUkG1-F      | ymUkG1 (yeast codon-optimized)-FLAG      | Fig. 1              |
| BY4741 + pGK416-yZsGreen-F    | yZsGreen (yeast codon-optimized)-FLAG    | Fig. 1              |
| BY4741 + pGK416-ymWasabi-F    | ymWasabi (yeast codon-optimized)-FLAG    | Fig. 1              |
| BY4741 + pGK416-ymNeonGreen-F | ymNeonGreen (yeast codon-optimized)-FLAG | Fig. 1              |

**Supplementary Table S3. Mean fluorescence intensity (MFI) of yeast transformants used for expression of various GFPs**

| GFP         | MFI    |
|-------------|--------|
| Control     | 36     |
| EGFP        | 1,490  |
| AcGFP1      | 542    |
| TagGFP2     | 240    |
| mUkG1       | 14,194 |
| ZsGreen     | 15,019 |
| yEGFP       | 33,551 |
| yAcGFP1     | 36,177 |
| yTagGFP2    | 24,250 |
| ymUkG1      | 47,088 |
| yZsGreen    | 44,154 |
| ymWasabi    | 16,987 |
| ymNeonGreen | 5,148  |

**Supplementary Table S4. List of yeast strains used for expression of various Fig1-GFPs as fusion tagged reporters**

| Strain           | Expression of protein                    | Figure |
|------------------|------------------------------------------|--------|
| BY4741 (Control) | –                                        | Fig. 2 |
| MC-F1            | Fig1-EGFP (mammalian codon-optimized)    | Fig. 2 |
| BYFAG1           | Fig1-AcGFP1 (mammalian codon-optimized)  | Fig. 2 |
| BYFTG1           | Fig1-TagGFP2 (mammalian codon-optimized) | Fig. 2 |
| BYFUG1           | Fig1-mUkG1                               | Fig. 2 |
| BYFZG1           | Fig1-ZsGreen                             | Fig. 2 |
| BYFEG2           | Fig1-yEGFP (yeast codon-optimized)       | Fig. 2 |
| BYFAG2           | Fig1-yAcGFP1 (yeast codon-optimized)     | Fig. 2 |
| BYFTG2           | Fig1-yTagGFP2 (yeast codon-optimized)    | Fig. 2 |
| BYFUG2           | Fig1-ymUkG1 (yeast codon-optimized)      | Fig. 2 |
| BYFZG2           | Fig1-yZsGreen (yeast codon-optimized)    | Fig. 2 |

**Supplementary Table S5. List of yeast transformants used for the Gy recruitment system for soluble cytosolic target protein**

| Transformant               | Target      | Candidate         | Repoter | Figure                                          |
|----------------------------|-------------|-------------------|---------|-------------------------------------------------|
|                            | X (cytosol) | Y (membrane)      | GFP     |                                                 |
| BFG2118 + pGk413 (Control) | Fc          | –                 | EGFP    | Figs. 3(A) and S5(A)                            |
| BFG2118 + pGK413-ZWTmem    | Fc          | Z <sub>WT</sub>   | EGFP    | Figs. 3(A), 4(A), 4(B) and S5(A)                |
| BFG2118 + pGK413-ZK35Amem  | Fc          | Z <sub>K35A</sub> | EGFP    | Figs. 3(A) and S5(A)                            |
| BFG2118 + pGK413-ZI31Amem  | Fc          | Z <sub>I31A</sub> | EGFP    | Figs. 3(A), 4(E), 4(F) and S5(A)                |
| BFG2118 + pGK413-Z955mem   | Fc          | Z <sub>955</sub>  | EGFP    | Figs. 3(A), 4(A), 4(B), 4(E), 4(F)<br>and S5(A) |
| UGFG2 + pGk413 (Control)   | Fc          | –                 | ymUkG1  | Figs. 3(A) and S5(B)                            |
| UGFG2 + pGK413-ZWTmem      | Fc          | Z <sub>WT</sub>   | ymUkG1  | Figs. 3(A), 4(C), 4(D) and S5(B)                |
| UGFG2 + pGK413-ZK35Amem    | Fc          | Z <sub>K35A</sub> | ymUkG1  | Figs. 3(A) and S5(B)                            |
| UGFG2 + pGK413-ZI31Amem    | Fc          | Z <sub>I31A</sub> | ymUkG1  | Figs. 3(A), 4(G), 4(H) and S5(B)                |
| UGFG2 + pGK413-Z955mem     | Fc          | Z <sub>955</sub>  | ymUkG1  | Figs. 3(A), 4(C), 4(D), 4(G), 4(H)<br>and S5(B) |

**Supplementary Table S6. List of yeast strains used for the Gy recruitment system for membrane target protein**

| Strain          | Target                              | Candidate         | Reporter GFP | Figure    |
|-----------------|-------------------------------------|-------------------|--------------|-----------|
|                 | X (membrane)                        | Y (cytosol)       |              |           |
| FC-G0 (Control) | C-terminally membrane-associated Fc | –                 | EGFP         | Fig. 3(B) |
| FC-GW           | C-terminally membrane-associated Fc | Z <sub>WT</sub>   | EGFP         | Fig. 3(B) |
| FC-GK           | C-terminally membrane-associated Fc | Z <sub>K35A</sub> | EGFP         | Fig. 3(B) |
| FC-GI           | C-terminally membrane-associated Fc | Z <sub>I31A</sub> | EGFP         | Fig. 3(B) |
| FC-G9           | C-terminally membrane-associated Fc | Z <sub>955</sub>  | EGFP         | Fig. 3(B) |
| FN-G0 (Control) | N-terminally membrane-associated Fc | –                 | EGFP         | Fig. S4   |
| FN-GW           | N-terminally membrane-associated Fc | Z <sub>WT</sub>   | EGFP         | Fig. S4   |
| FN-GK           | N-terminally membrane-associated Fc | Z <sub>K35A</sub> | EGFP         | Fig. S4   |
| FN-GI           | N-terminally membrane-associated Fc | Z <sub>I31A</sub> | EGFP         | Fig. S4   |
| FN-G9           | N-terminally membrane-associated Fc | Z <sub>955</sub>  | EGFP         | Fig. S4   |
| UG2-FCG0        | C-terminally membrane-associated Fc | –                 | ymUkG1       | Fig. 3(B) |
| UG2-FCGW        | C-terminally membrane-associated Fc | Z <sub>WT</sub>   | ymUkG1       | Fig. 3(B) |
| UG2-FCGK        | C-terminally membrane-associated Fc | Z <sub>K35A</sub> | ymUkG1       | Fig. 3(B) |
| UG2-FCGI        | C-terminally membrane-associated Fc | Z <sub>I31A</sub> | ymUkG1       | Fig. 3(B) |
| UG2-FCG9        | C-terminally membrane-associated Fc | Z <sub>955</sub>  | ymUkG1       | Fig. 3(B) |
| UG2-FNG0        | N-terminally membrane-associated Fc | –                 | ymUkG1       | Fig. S4   |
| UG2-FNGW        | N-terminally membrane-associated Fc | Z <sub>WT</sub>   | ymUkG1       | Fig. S4   |
| UG2-FNGK        | N-terminally membrane-associated Fc | Z <sub>K35A</sub> | ymUkG1       | Fig. S4   |
| UG2-FNGI        | N-terminally membrane-associated Fc | Z <sub>I31A</sub> | ymUkG1       | Fig. S4   |
| UG2-FNG9        | N-terminally membrane-associated Fc | Z <sub>955</sub>  | ymUkG1       | Fig. S4   |

**Supplementary Table S7. Summary of the FACS analysis of the Gy recruitment system for cytosolic target proteins.** The percentage of cells belonging to GFP<sup>+</sup> were measured by flow cytometry.

| Reporter GFP | Type of Z variant | Percentage of GFP <sup>+</sup> |
|--------------|-------------------|--------------------------------|
| EGFP         | Z <sub>WT</sub>   | 58.8                           |
| EGFP         | Z <sub>K35A</sub> | 13.9                           |
| EGFP         | Z <sub>I31A</sub> | 2.5                            |
| EGFP         | Z <sub>955</sub>  | 0                              |
| EGFP         | Control           | 0                              |
| ymUkG1       | Z <sub>WT</sub>   | 98.3                           |
| ymUkG1       | Z <sub>K35A</sub> | 95.4                           |
| ymUkG1       | Z <sub>I31A</sub> | 80.3                           |
| ymUkG1       | Z <sub>955</sub>  | 0                              |
| ymUkG1       | Control           | 0                              |

**Supplementary Table S8. List of primers**

| No. | Name                            | Sequence (5' to 3')                                       |
|-----|---------------------------------|-----------------------------------------------------------|
| 1   | Sall-start-AcGFP1-fw            | aaaagtcgacatggtgagcaagggc                                 |
| 2   | BamHI-end-AcGFP1-rv             | tttggatcctcactgtacagctcat                                 |
| 3   | Sall-start-TagGFP2-fw           | aaaagtcgacatgagcggggcgaggag                               |
| 4   | BamHI-end-TagGFP2-rv            | tttggatcctacctgtacagctcgtc                                |
| 5   | Sall-start-mUkG1-fw             | aaaagtcgacatggtgagtgattaaa                                |
| 6   | BamHI-end-mUkG1-rv              | tttggatcctactcgaagcctgact                                 |
| 7   | Sall-start-EGFP(Yeast)-fw       | aaaagtcgacatggtcagtaagggtgaa                              |
| 8   | BamHI-end-EGFP(Yeast)-rv        | tttggatcctactgtataattcgtc                                 |
| 9   | Sall-start-AcGFP1(Yeast)-fw     | aaaagtcgacatggttctaaggggtgt                               |
| 10  | BamHI-end-AcGFP1(Yeast)-rv      | tttggatcctactgtataattcgtc                                 |
| 11  | Sall-start-TagGFP2(Yeast)-fw    | aaaagtcgacatgtctggtggaagaa                                |
| 12  | BamHI-end-TagGFP2(Yeast)-rv     | tttggatcctcatctgtataattcgtc                               |
| 13  | Sall-start-mUkG1(Yeast)-fw      | aaaagtcgacatggtcagtgatcaaaaga                             |
| 14  | BamHI-end-mUkG1(Yeast)-rv       | tttggatcctactagaagcttgagatg                               |
| 15  | Sall-start-ZsGreen(Yeast)-fw    | aaaagtcgacatggctcaatccaaacat                              |
| 16  | BamHI-end-ZsGreen (Yeast)-rv    | tttggatcctatggcaaagcagaacc                                |
| 17  | Sall-start-mWasabi (Yeast)-fw   | tagcgtcgacatggtgagcaagggcgagg                             |
| 18  | BamHI-end-mWasabi (Yeast)-rv    | tagaccgggttactgtataattcatccatccg                          |
| 19  | Sall-start-mNeonGreen(Yeast)-fw | agcgtcgacatggtcagtaaggggaaga                              |
| 20  | BamHI-end-mNeonGreen (Yeast)-rv | cgggggatcctactgtataattcatc                                |
| 21  | Sall-atg-EGFP-fw                | tagcgtcgacatggtgagcaagggcgagga                            |
| 22  | BamHI-end-frag-EGFP-rv          | cgggggatcctactgtcatcgtcatcctgtagcctgtacagctcgtccatgccga   |
| 23  | BamHI-end-frag-AcGFP1-rv        | cgggggatcctcactgtcatcgtcatcctgtagcctgtacagctcatccatgccgt  |
| 24  | BamHI-end-frag-TagGFP2-rv       | cgggggatcctactgtcatcgtcatcctgtagcctgtacagctcgtccatgccgt   |
| 25  | BamHI-end-frag-mUkG1-rv         | cgggggatcctactgtcatcgtcatcctgtagcctcgaagcctgactggcagca    |
| 26  | Sall-atg-ZsGreen-fw             | tagcgtcgacatggctcagcaaaagcac                              |
| 27  | BamHI-end-frag-ZsGreen-rv       | cgggggatcctcactgtcatcgtcatcctgtagtcgggcaatgcagatccgatgcaa |
| 28  | BamHI-end-frag-yEGFP-rv         | cgggggatcctactgtcatcgtcatcctgtagcctgtataattcgtccataccca   |
| 29  | BamHI-end-frag-yAcGFP1-rv       | cgggggatcctactgtcatcgtcatcctgtagcctgtataattcgtccataccat   |



|    |                               |                                                                                              |
|----|-------------------------------|----------------------------------------------------------------------------------------------|
| 30 | BamHI-end-frag-yTagGFP2-rv    | cgggggatcctcactgtcatcgatcctttagtctctgtataattcgccataccgt                                      |
| 31 | BamHI-end-frag-ymUkG1-rv      | cgggggatccttactgtcatcgatcctttagtctcttagaagcttgagatggcaaca                                    |
| 32 | BamHI-end-frag-yZsGreen-rv    | cgggggatccttactgtcatcgatcctttagtctctggcaaacgagaacctgaagcaa                                   |
| 33 | BamHI-end-frag-ymWasabi-rv    | cgggggatccttactgtcatcgatcctttagtctctgtataattcatccataccat                                     |
| 34 | BamHI-end-frag-ymNeonGreen-rv | cgggggatccttactgtcatcgatcctttagtctctgtataattcatccataccca                                     |
| 35 | XhoI-FIG1down-fw              | ggggctcgagttttatcctcaataaacat                                                                |
| 36 | KpnI-FIG1down-rv              | ccccgtaccaacagacggtaatgattaga                                                                |
| 37 | TFIG1hr40-URA3-fw             | ttttatcctcaataaacatataagttttgagcggatattttttgtcttttttgattccg                                  |
| 38 | XhoI-URA3-rv                  | gaggataaaactcgaggggtaataactgatataatt                                                         |
| 39 | SacII-FIG1end50-AcGFP1-fw     | aaaaccgcgataggtacaataactactcttcggattcatctacattgcattccaaagtgtgagca<br>agggcgccgagctgtccaccggc |
| 40 | AcGFP1-TFIG1hr40-rv           | aatatccgctcaaaactatagtgtttattgaggataaaactactgtacagctcatccatgccgtgg<br>gt                     |
| 41 | SacII-FIG1end50-TagGFP2-fw    | aaaaccgcgataggtacaataactactcttcggattcatctacattgcattccaaagttagcggg<br>ggcgaggagctgttcgccggc   |
| 42 | TagGFP2-TFIG1hr40-rv          | aatatccgctcaaaactatagtgtttattgaggataaaactactgtacagctctccatgccg                               |
| 43 | SacII-FIG1end50-mUkG1-fw      | aaaaccgcgataggtacaataactactcttcggattcatctacattgcattccaaagtgtgagtg<br>tgattaaagagga           |
| 44 | mUkG1-TFIG1hr40-rv            | aatatccgctcaaaactatagtgtttattgaggataaaactactcgaagcctgactggcagc                               |
| 45 | SacII-FIG1end50-ZsGreen-fw    | aaaaccgcgataggtacaataactactcttcggattcatctacattgcattccaaagtgtcagtg<br>caaagcacggtct           |
| 46 | ZsGreen-TFIG1hr40-rv          | aatatccgctcaaaactatagtgtttattgaggataaaactcagggaatgcagatccggatgca                             |
| 47 | SacII-FIG1end50-EGFP(Y)-fw    | aaaaccgcgataggtacaataactactcttcggattcatctacattgcattccaaagtgtcagta<br>aggggaagaattattcactggt  |
| 48 | EGFP(Y)-TFIG1hr40-rv          | aatatccgctcaaaactatagtgtttattgaggataaaactactgtataattcgccataccc                               |
| 49 | SacII-FIG1end50-AcGFP1(Y)-fw  | aaaaccgcgataggtacaataactactcttcggattcatctacattgcattccaaagtgttctaa<br>gggtgctgaatt            |
| 50 | AcGFP1(Y)-TFIG1hr40-rv        | aatatccgctcaaaactatagtgtttattgaggataaaactactgtataattcgccatacca                               |
| 51 | SacII-FIG1end50-TagGFP2(Y)-fw | aaaaccgcgataggtacaataactactcttcggattcatctacattgcattccaaagttctgggg<br>tgaagaattatt            |
| 52 | TagGFP2(Y)-TFIG1hr40-rv       | aatatccgctcaaaactatagtgtttattgaggataaaactactgtataattcgccataccg                               |
| 53 | SacII-FIG1end50-mUkG1(Y)-fw   | aaaaccgcgataggtacaataactactcttcggattcatctacattgcattccaaagtgtcagtg                            |

|    |                               |                                                                                                    |
|----|-------------------------------|----------------------------------------------------------------------------------------------------|
|    |                               | catcaaagaaga                                                                                       |
| 54 | mUkG1(Y)-TFIG1hr40-rv         | aatatccgctcaaaactatatgtttattgaggataaaactactagaagctgagatggcaac                                      |
| 55 | SacII-FIG1end50-ZsGreen(Y)-fw | aaaaccgcgataggtacaataactactctcggattcatctacattgcattccaaagtgctcaat<br>ccaacatggttt                   |
| 56 | ZsGreen(Y)-TFIG1hr40-rv       | aatatccgctcaaaactatatgtttattgaggataaaattatggcaaagcagaacctgaagca                                    |
| 57 | FIG1end50-fw                  | ataggtacaataactactctcggattcat                                                                      |
| 58 | TFIG200-rv                    | aacagacggtaatgattagatttaggtaa                                                                      |
| 59 | Ste18pro-fw                   | atattatataatataagggcgt                                                                             |
| 60 | Ste18t-rv                     | aaattatagaaagcagtagataaaa                                                                          |
| 61 | HIS3pro80-URA3-fw             | tatataagtaatgtgatttctcgaagaataactaaaaaatgagcaggcaagataaacgaagg<br>caaagtcaattcatcattttttttattctttt |
| 62 | HIS3t end40-rv                | ggagccataatgacagcagttggtaggccttctttgt                                                              |
